# Supplementary material for: Photo-initiated ground state chemistry: How important is it in the atmosphere?
Source: Copernicus journal article supplement (doi:10.5194/acp-2021-424), 2021-06-15
Supplement: Supplementary file 3 [file acp-2021-424-supplement.zip]

Archive with 3 entries (3 files):
- .DS_Store
- GS_SM_xyz_files.zip
- supp_mat.pdf
